# Supplementary material for: Effect of COVID-19 Vaccines on Reducing the Risk of Long COVID in the Real World: A Systematic Review and Meta-Analysis
Source: MDPI journal article supplement (doi:10.3390/ijerph191912422), 2022-09-29
Supplement: s1 [file s1]

**Table S1.** Search strategy.

| Database | Search query                                                                                                                                                                                                                                                                                                                                                                                                                                                                                                                                                                                                                                                                                                                                                                                                                                                                                  |
|----------|-----------------------------------------------------------------------------------------------------------------------------------------------------------------------------------------------------------------------------------------------------------------------------------------------------------------------------------------------------------------------------------------------------------------------------------------------------------------------------------------------------------------------------------------------------------------------------------------------------------------------------------------------------------------------------------------------------------------------------------------------------------------------------------------------------------------------------------------------------------------------------------------------|
| PubMed   | <p>((COVID-19 Vaccines[MeSH Terms]) OR (Vaccines[MeSH Terms]) OR (Vaccination[MeSH Terms]) OR (Vaccin*[Title/Abstract])) AND ((post-acute COVID-19 syndrome[Supplementary Concept]) OR (post-acute COVID-19 syndrome[Title/Abstract]) OR (long-COVID[Title/Abstract]) OR (long-haul COVID[Title/Abstract]) OR (post-acute COVID syndrome[Title/Abstract]) OR (persistent COVID-19[Title/Abstract]) OR (long hauler COVID[Title/Abstract]) OR (long COVID[Title/Abstract]) OR (post-acute sequelae of SARS-CoV-2 infection[Title/Abstract]) OR (long haul COVID[Title/Abstract]) OR (chronic COVID syndrome[Title/Abstract]) OR (post COVID-19[Title/Abstract]) OR (post-acute COVID-19[Title/Abstract]) OR (COVID-19 sequelae[Title/Abstract]) OR (post-acute sequelae of COVID-19[Title/Abstract]) OR (post COVID-19 condition[Title/Abstract]) OR (long-term symptoms[Title/Abstract]))</p> |
| Embase   | <p>(‘sars-cov-2 vaccine’/exp OR ‘vaccine’/exp OR ‘vaccin*’:ab,ti) AND (‘long COVID’/exp OR (‘long COVID’ OR ‘chronic COVID syndrome’ OR ‘chronic COVID-19’ OR ‘COVID long-hauler’ OR ‘COVID-19 long-hauler’ OR ‘long haul COVID’ OR ‘long hauler COVID’ OR ‘post COVID 19’ OR ‘post-acute COVID’ OR ‘post COVID-19’ OR ‘post-acute COVID-19’ OR ‘COVID-19 sequelae’ OR ‘post-acute sequelae of COVID-19’ OR ‘post COVID-19 condition’ OR ‘long-term symptoms’):ab,ti)</p>                                                                                                                                                                                                                                                                                                                                                                                                                     |

Web of  
science

---

(TS= ("COVID-19 Vaccines" OR "sars-cov-2 vaccine" OR "vaccine" OR "vaccination") OR TI= ("vaccin\*") OR AB= ("vaccin\*")) AND (TS= ("post-acute COVID-19 syndrome" OR "long COVID") OR TI= ("post-acute COVID-19 syndrome" OR "long COVID" OR "long-haul COVID" OR "post-acute COVID syndrome" OR "persistent COVID-19" OR "post-acute sequelae of SARS-CoV-2 infection" OR "chronic COVID syndrome" OR "chronic COVID-19" OR "COVID long-hauler" OR "COVID-19 long-hauler" OR "long haul COVID" OR "long hauler COVID" OR "post COVID 19" OR "post-acute COVID" OR "post COVID-19" OR "post-acute COVID-19" OR "COVID-19 sequelae" OR "post-acute sequelae of COVID-19" OR "post COVID-19 condition" OR "long-term symptoms") OR AB= ("post-acute COVID-19 syndrome" OR "long COVID" OR "long-haul COVID" OR "post-acute COVID syndrome" OR "persistent COVID-19" OR "post-acute sequelae of SARS-CoV-2 infection" OR "chronic COVID syndrome" OR "chronic COVID-19" OR "COVID long-hauler" OR "COVID-19 long-hauler" OR "long haul COVID" OR "long hauler COVID" OR "post COVID 19" OR "post-acute COVID" OR "post COVID-19" OR "post-acute COVID-19" OR "COVID-19 sequelae" OR "post-acute sequelae of COVID-19" OR "post COVID-19 condition" OR "long-term symptoms"))

The following search query was used for the title, abstract, and author-specified keywords of article. Due to the limitation on the ScienceDirect number of terms in the ScienceDirect database, the search query was divided into four parts.

---

Part1: ((COVID-19 Vaccine) OR (vaccine) OR (vaccination)) AND  
((post-acute COVID-19 syndrome) OR (long-COVID) OR (long-  
haul COVID) OR (persistent COVID-19) OR (long hauler  
COVID))

Part2: ((COVID-19 Vaccine) OR (vaccine) OR (vaccination)) AND  
((long COVID) OR (post-acute sequelae of SARS-CoV-2 infection)  
OR (long haul COVID) OR (chronic COVID syndrome) OR  
(chronic COVID-19))

Part3: ((COVID-19 Vaccine) OR (vaccine) OR (vaccination)) AND  
((COVID long-hauler) OR (COVID-19 long-hauler) OR (post  
COVID 19) OR (post-acute COVID) OR (post COVID-19))

Part4: ((COVID-19 Vaccine) OR (vaccine) OR (vaccination)) AND  
((post-acute COVID-19) OR (COVID-19 sequelae) OR (post-acute  
sequelae of COVID-19) OR (post COVID-19 condition) OR (long-  
term symptoms))

---

Table S2. Data for meta-analysis.

| Study ID   | Age (mean±SD or range) (years) | The number of doses | Sample size for meta-analysis | At least one symptom | Anxiety and/or depression | Chest or throat pain | Cognitive dysfunction/ symptoms | Fatigue | Hair loss | Headache/ migraine | Kidney diseases/problems | Loss of concentration | Loss of smell | Loss of taste | Myalgia | Nausea and/or vomiting | Respiratory symptoms/ sequelae | Sleeping disorders/problems sleeping | Weight loss |
|------------|--------------------------------|---------------------|-------------------------------|----------------------|---------------------------|----------------------|---------------------------------|---------|-----------|--------------------|--------------------------|-----------------------|---------------|---------------|---------|------------------------|--------------------------------|--------------------------------------|-------------|
| Nehme 2022 | 43.5±13.7                      | 2                   | 347                           | 69                   |                           |                      |                                 |         |           |                    |                          |                       |               |               |         |                        |                                |                                      |             |
|            |                                | 1                   | 424                           | 102                  |                           |                      |                                 |         |           |                    |                          |                       |               |               |         |                        |                                |                                      |             |
|            |                                | 0                   | 825                           | 241                  |                           |                      |                                 |         |           |                    |                          |                       |               |               |         |                        |                                |                                      |             |
|            | <40                            | 2                   | 93                            | 19                   |                           |                      |                                 |         |           |                    |                          |                       |               |               |         |                        |                                |                                      |             |
|            |                                | 1                   | 138                           | 31                   |                           |                      |                                 |         |           |                    |                          |                       |               |               |         |                        |                                |                                      |             |
|            |                                | 0                   | 473                           | 138                  |                           |                      |                                 |         |           |                    |                          |                       |               |               |         |                        |                                |                                      |             |
|            | 40-59                          | 2                   | 166                           | 40                   |                           |                      |                                 |         |           |                    |                          |                       |               |               |         |                        |                                |                                      |             |
|            |                                | 1                   | 229                           | 53                   |                           |                      |                                 |         |           |                    |                          |                       |               |               |         |                        |                                |                                      |             |
|            |                                | 0                   | 302                           | 88                   |                           |                      |                                 |         |           |                    |                          |                       |               |               |         |                        |                                |                                      |             |
|            | ≥60                            | 2                   | 88                            | 10                   |                           |                      |                                 |         |           |                    |                          |                       |               |               |         |                        |                                |                                      |             |
|            |                                | 1                   | 57                            | 18                   |                           |                      |                                 |         |           |                    |                          |                       |               |               |         |                        |                                |                                      |             |
|            |                                | 0                   | 50                            | 15                   |                           |                      |                                 |         |           |                    |                          |                       |               |               |         |                        |                                |                                      |             |
| Ayoubkhani | 18-69                          | 2                   | 3090                          | 294                  |                           |                      |                                 |         |           |                    |                          |                       |               |               |         |                        |                                |                                      |             |
| 2022       |                                | 0                   | 3090                          | 452                  |                           |                      |                                 |         |           |                    |                          |                       |               |               |         |                        |                                |                                      |             |
| Kuodi 2022 | 44                             | 2                   | 294                           |                      | 17                        | 14                   |                                 | 33      | 9         | 41                 | 2                        | 13                    | 9             | 15            |         | 7                      | 14                             | 14                                   | 8           |
|            | 52                             | 1                   | 340                           |                      | 19                        | 24                   |                                 | 93      | 43        | 80                 | 5                        | 44                    | 9             | 20            |         | 11                     | 29                             | 42                                   | 6           |
|            | 39                             | 0                   | 317                           |                      | 19                        | 23                   |                                 | 82      | 36        | 69                 | 5                        | 33                    | 23            | 28            |         | 19                     | 25                             | 29                                   | 14          |
| Alghamdi   | 12-70                          | 2                   | 1696                          |                      | 497                       |                      | 471                             |         |           |                    |                          |                       | 1048          | 1048          |         |                        |                                | 406                                  |             |
|            |                                | 1                   | 360                           |                      | 129                       |                      | 100                             |         |           |                    |                          |                       | 250           | 250           |         |                        |                                | 87                                   |             |
|            |                                | 0                   | 162                           |                      | 60                        |                      | 44                              |         |           |                    |                          |                       | 114           | 114           |         |                        |                                | 48                                   |             |

|                |                                |                  |         |         |      |      |      |      |      |      |      |
|----------------|--------------------------------|------------------|---------|---------|------|------|------|------|------|------|------|
| Simon 2021     | NA                             | 1                | 20,188  | 7532    |      |      |      |      |      |      |      |
|                |                                | 0                | 220,460 | 123,365 |      |      |      |      |      |      |      |
| Taquet 2022    | 57.0±17.9                      | 2                | 6957    | 4518    | 2159 | 1163 | 831  | 1444 | 1122 | 443  | 1698 |
|                |                                | 0                | 6957    | 4566    | 2245 | 1160 | 901  | 1414 | 1087 | 645  | 1759 |
|                |                                | 1                | 2996    | 1927    | 910  | 456  | 327  | 548  | 477  | 162  | 729  |
|                |                                | 0                | 2996    | 1985    | 956  | 442  | 408  | 567  | 463  | 221  | 726  |
|                | <60                            | ≥1               | 4633    | 2893    | 1505 | 680  | 242  | 718  | 840  | 206  | 959  |
|                |                                | 0                | 4633    | 2868    | 1344 | 661  | 287  | 601  | 823  | 259  | 947  |
|                |                                | ≥1               | 4657    | 3129    | 1544 | 865  | 815  | 1099 | 676  | 409  | 1344 |
|                |                                | 0                | 4657    | 3231    | 1432 | 857  | 827  | 1146 | 723  | 442  | 1383 |
| Otmani 2022    | NA                             | ≥1               | 63      | 31      |      |      |      |      |      |      |      |
|                |                                | 0                | 55      | 25      |      |      |      |      |      |      |      |
| Azzolini 2022  | 44.3±10.7 (with long COVID);   | 3                | 262     | 42      |      |      |      |      |      |      |      |
|                |                                | 2                | 46      | 8       |      |      |      |      |      |      |      |
|                | 41.2±11.4 (without long COVID) | 1                | 10      | 3       |      |      |      |      |      |      |      |
|                |                                | 0                | 421     | 176     |      |      |      |      |      |      |      |
| Wynberg 2022   | 53.5 (IQR: 41.0-64.0)          | ≥1               | 216     | 119     |      |      |      |      |      |      |      |
|                |                                | 0                | 99      | 66      |      |      |      |      |      |      |      |
| Al-Aly 2022    | 66.63±13.84                    | ≥1               | 33,940  | 10,842  |      |      | 822  |      |      | 949  |      |
|                | 57.81±15.94                    | 0                | 113,474 | 41,173  |      |      | 3808 |      |      | 4644 |      |
| Fernández 2022 | 41.0±16.8                      | ≥1               | 98,715  | 394     |      |      |      |      |      |      |      |
|                |                                | 0                | 12,011  | 161     |      |      |      |      |      |      |      |
| Messiah 2022   | 5-19                           | Fully vaccinated | 475     | 13      |      |      |      |      |      |      |      |

|                     |            |                         |         |      |     |     |     |     |     |     |    |    |     |     |     |     |    |  |  |  |  |
|---------------------|------------|-------------------------|---------|------|-----|-----|-----|-----|-----|-----|----|----|-----|-----|-----|-----|----|--|--|--|--|
| Meza-Torres<br>2022 | 44.5±21.77 | Partially<br>vaccinated | 142     | 1    |     |     |     |     |     |     |    |    |     |     |     |     |    |  |  |  |  |
|                     |            | 0                       | 1131    | 67   |     |     |     |     |     |     |    |    |     |     |     |     |    |  |  |  |  |
|                     |            | 2                       | 726     | 10   |     |     |     |     |     |     |    |    |     |     |     |     |    |  |  |  |  |
|                     |            | 1                       | 15,832  | 266  |     |     |     |     |     |     |    |    |     |     |     |     |    |  |  |  |  |
|                     |            | 0                       | 392,324 | 7347 |     |     |     |     |     |     |    |    |     |     |     |     |    |  |  |  |  |
| Peghin 2022         | ≥18        | ≥1                      | 132     | 59   |     |     |     |     |     |     |    |    |     |     |     |     |    |  |  |  |  |
|                     |            | 0                       | 347     | 167  |     |     |     |     |     |     |    |    |     |     |     |     |    |  |  |  |  |
| Pinato 2022         | ≥18        | Fully<br>vaccinated     | 60      | 5    | 4   |     |     |     |     |     |    |    |     |     |     |     |    |  |  |  |  |
|                     |            | Partially<br>vaccinated | 33      | 4    | 2   |     |     |     |     |     |    |    |     |     |     |     |    |  |  |  |  |
|                     |            | 0                       | 1135    | 195  | 70  |     |     |     |     |     |    |    |     |     |     |     |    |  |  |  |  |
| Zisis 2022          | ≥18        | Fully<br>vaccinated     | 25,225  | 605  |     |     |     | 247 |     |     |    |    |     |     |     |     |    |  |  |  |  |
|                     |            | 0                       | 25,225  | 1268 |     |     |     | 635 |     |     |    |    |     |     |     |     |    |  |  |  |  |
| Budhiraja<br>2022   | <18-≥75    | 2                       | 913     | 718  | 28  | 73  | 143 | 14  | 90  | 16  | 4  | 10 | 89  | 63  | 53  | 99  | 50 |  |  |  |  |
|                     |            | 0                       | 4616    | 3571 | 260 | 341 | 795 | 59  | 194 | 172 | 25 | 98 | 732 | 259 | 135 | 736 | 87 |  |  |  |  |
| Hajjaji 2022        | ≥18        | 2                       | 44      | 7    |     |     |     |     |     |     |    |    |     |     |     |     |    |  |  |  |  |
|                     |            | 1                       | 78      | 19   |     |     |     |     |     |     |    |    |     |     |     |     |    |  |  |  |  |
|                     |            | 0                       | 46      | 11   |     |     |     |     |     |     |    |    |     |     |     |     |    |  |  |  |  |

Table S3. Quality assessment of included studies.

| NOS for cohort study       |                                          |                                     |                           |                                                                 |                                                                 |                       |                                                 |                                  |   |               |              |
|----------------------------|------------------------------------------|-------------------------------------|---------------------------|-----------------------------------------------------------------|-----------------------------------------------------------------|-----------------------|-------------------------------------------------|----------------------------------|---|---------------|--------------|
| Study ID                   | Selection                                |                                     |                           | Comparability                                                   |                                                                 |                       | Outcome                                         |                                  |   | Total scores  | Risk of bias |
|                            | Representativeness of the exposed cohort | Selection of the non exposed cohort | Ascertainment of exposure | Demonstration that outcome of interest was not present at start | Comparability of cohorts on the basis of the design or analysis | Assessment of outcome | Was follow-up long enough for outcomes to occur | Adequacy of follow up of cohorts |   |               |              |
|                            |                                          |                                     |                           | of study                                                        |                                                                 |                       |                                                 |                                  |   |               |              |
| Ayoubkhani 2022            | 1                                        | 1                                   | 0                         | 0                                                               | 1                                                               | 0                     | 1                                               | 1                                | 5 | Moderate risk |              |
| Simon 2021                 | 1                                        | 1                                   | 1                         | 0                                                               | 2                                                               | 1                     | 1                                               | 1                                | 8 | Low risk      |              |
| Taquet 2022                | 1                                        | 1                                   | 1                         | 0                                                               | 2                                                               | 1                     | 1                                               | 1                                | 8 | Low risk      |              |
| Azzolini 2022              | 0                                        | 1                                   | 0                         | 0                                                               | 2                                                               | 0                     | 1                                               | 1                                | 5 | Moderate risk |              |
| Wynberg 2022               | 1                                        | 1                                   | 1                         | 1                                                               | 2                                                               | 0                     | 1                                               | 1                                | 8 | Low risk      |              |
| Al-Aly 2022                | 1                                        | 1                                   | 1                         | 0                                                               | 2                                                               | 1                     | 1                                               | 1                                | 8 | Low risk      |              |
| Fernández 2022             | 1                                        | 1                                   | 1                         | 0                                                               | 2                                                               | 1                     | 1                                               | 1                                | 8 | Low risk      |              |
| Messiah 2022               | 0                                        | 1                                   | 1                         | 1                                                               | 2                                                               | 0                     | 1                                               | 1                                | 7 | Low risk      |              |
| Meza-Torres 2022           | 1                                        | 1                                   | 1                         | 0                                                               | 2                                                               | 1                     | 1                                               | 1                                | 8 | Low risk      |              |
| Peghin 2022                | 0                                        | 1                                   | 1                         | 1                                                               | 2                                                               | 1                     | 1                                               | 1                                | 8 | Low risk      |              |
| Pinato 2022                | 1                                        | 1                                   | 1                         | 0                                                               | 2                                                               | 1                     | 0                                               | 1                                | 7 | Low risk      |              |
| Zisis 2022                 | 1                                        | 1                                   | 1                         | 0                                                               | 2                                                               | 1                     | 1                                               | 1                                | 8 | Low risk      |              |
|                            |                                          |                                     |                           |                                                                 |                                                                 |                       |                                                 |                                  |   |               |              |
| NOS for case-control study |                                          |                                     |                           |                                                                 |                                                                 |                       |                                                 |                                  |   |               |              |
| Study ID                   | Selection                                |                                     |                           | Comparability                                                   |                                                                 |                       | Exposure                                        |                                  |   | Risk of bias  |              |

|                                | Is the case definition<br>adequate                                      | Representativenes<br>s of the cases                                                                                                               | Selection of<br>Controls                                       | Definition of<br>Controls                                                                 | Comparability of cases and controls on the basis<br>of the design or analysis                                                       | Ascertainment of<br>exposure                                                      | Same method of ascertainment for<br>cases and controls   | Non-Response<br>rate                                                | Total<br>scores                                                                     |                                                                                        |                                                                                                                                                       |                 |               |
|--------------------------------|-------------------------------------------------------------------------|---------------------------------------------------------------------------------------------------------------------------------------------------|----------------------------------------------------------------|-------------------------------------------------------------------------------------------|-------------------------------------------------------------------------------------------------------------------------------------|-----------------------------------------------------------------------------------|----------------------------------------------------------|---------------------------------------------------------------------|-------------------------------------------------------------------------------------|----------------------------------------------------------------------------------------|-------------------------------------------------------------------------------------------------------------------------------------------------------|-----------------|---------------|
| Otmani 2022                    | 1                                                                       | 1                                                                                                                                                 | 1                                                              | 1                                                                                         | 2                                                                                                                                   | 0                                                                                 | 1                                                        | 0                                                                   | 7                                                                                   | Low risk                                                                               |                                                                                                                                                       |                 |               |
| AHRQ for cross-sectional study |                                                                         |                                                                                                                                                   |                                                                |                                                                                           |                                                                                                                                     |                                                                                   |                                                          |                                                                     |                                                                                     |                                                                                        |                                                                                                                                                       |                 |               |
| Study ID                       | Items                                                                   |                                                                                                                                                   |                                                                |                                                                                           |                                                                                                                                     |                                                                                   |                                                          |                                                                     |                                                                                     |                                                                                        |                                                                                                                                                       | Total<br>scores | Risk of bias  |
|                                | Define the<br>source of<br>information<br>(survey,<br>record<br>review) | List inclusion and<br>exclusion criteria for<br>exposed and<br>unexposed subjects<br>(cases and controls)<br>or refer to previous<br>publications | Indicate<br>time period<br>used for<br>identifying<br>patients | Indicate whether<br>or not subjects<br>were<br>consecutive if<br>not population-<br>based | Indicate if evaluators of<br>subjective components<br>of study were masked to<br>other aspects of the<br>status of the participants | Describe any<br>assessments<br>undertaken for<br>quality<br>assurance<br>purposes | Explain any<br>patient<br>exclusions<br>from<br>analysis | Describe how<br>confounding<br>was assessed<br>and/or<br>controlled | If applicable,<br>explain how<br>missing data<br>were handled<br>in the<br>analysis | Summarize<br>patient<br>response rates<br>and<br>completeness<br>of data<br>collection | Clarify what follow-<br>up, if any, was<br>expected and the<br>percentage of<br>patients for which<br>incomplete data or<br>follow-up was<br>obtained |                 |               |
| Nehme 2022                     | 1                                                                       | 1                                                                                                                                                 | 1                                                              | 1                                                                                         | 1                                                                                                                                   | 0                                                                                 | 0                                                        | 1                                                                   | 0                                                                                   | 1                                                                                      | 1                                                                                                                                                     | 8               | Low risk      |
| Kuodi 2022                     | 1                                                                       | 1                                                                                                                                                 | 1                                                              | 1                                                                                         | 1                                                                                                                                   | 1                                                                                 | 1                                                        | 1                                                                   | 0                                                                                   | 1                                                                                      | 1                                                                                                                                                     | 10              | Low risk      |
| Alghamdi 2022                  | 1                                                                       | 1                                                                                                                                                 | 0                                                              | 1                                                                                         | 1                                                                                                                                   | 0                                                                                 | 0                                                        | 1                                                                   | 0                                                                                   | 0                                                                                      | 1                                                                                                                                                     | 6               | Moderate risk |
| Budhiraja 2022                 | 1                                                                       | 1                                                                                                                                                 | 1                                                              | 1                                                                                         | 1                                                                                                                                   | 0                                                                                 | 1                                                        | 1                                                                   | 0                                                                                   | 1                                                                                      | 0                                                                                                                                                     | 8               | Low risk      |
| Hajjaji 2022                   | 1                                                                       | 1                                                                                                                                                 | 1                                                              | 1                                                                                         | 1                                                                                                                                   | 0                                                                                 | 0                                                        | 0                                                                   | 0                                                                                   | 1                                                                                      | 1                                                                                                                                                     | 7               | Moderate risk |



**Table S4.** Sensitivity analysis by excluding a study every time.

| Excluded study   | I <sup>2</sup> (%) | RR (95% CI)      | P value of meta-analysis |
|------------------|--------------------|------------------|--------------------------|
| Aly-Aly 2022     | 99                 | 0.70 (0.57-0.87) | <0.01                    |
| Ayoubkhani 2022  | 99                 | 0.72 (0.58-0.89) | <0.01                    |
| Azzolini 2022    | 99                 | 0.74 (0.61-0.90) | <0.01                    |
| Budhiraja 2022   | 99                 | 0.69 (0.56-0.85) | <0.01                    |
| Fernández 2022   | 99                 | 0.77 (0.67-0.90) | <0.01                    |
| Hajjaji 2022     | 99                 | 0.71 (0.57-0.87) | <0.01                    |
| Messiah 2022     | 99                 | 0.74 (0.60-0.90) | <0.01                    |
| Meza-Torres 2022 | 99                 | 0.70 (0.57-0.86) | <0.01                    |
| Nehme 2022       | 99                 | 0.71 (0.57-0.88) | <0.01                    |
| Otimani 2022     | 99                 | 0.69 (0.57-0.85) | <0.01                    |
| Peghin 2022      | 99                 | 0.70 (0.57-0.86) | <0.01                    |
| Pinato 2022      | 99                 | 0.72 (0.59-0.89) | <0.01                    |
| Simon 2021       | 96                 | 0.72 (0.58-0.89) | <0.01                    |
| Taquet 2022      | 99                 | 0.69 (0.56-0.85) | <0.01                    |
| Wynberg 2022     | 99                 | 0.70 (0.57-0.87) | <0.01                    |
